# Supplementary material for: Isolation and FTIR-ATR and 1H NMR Characterization of Alginates from the Main Alginophyte Species of the Atlantic Coast of Morocco
Source: PubMed Central journal article supplement (PMC7570942; doi:10.3390/molecules25184335), 2020-09-22
Supplement: molecules-25-04335-s001.pdf [file molecules-25-04335-s001.pdf]

## Supplementary Material

# Isolation and FTIR-ATR and $^1\text{H}$ NMR Characterization of Alginates from the Main Alginophyte Species of the Atlantic Coast of Morocco

Zahira Belattmania <sup>1</sup>, Soukaina Kaidi <sup>1</sup>, Samir El Atouani <sup>1</sup>, Chaimaa Katif <sup>1</sup>, Fouad Bentiss <sup>2,3</sup>, Charafeddine Jama <sup>3</sup>, Abdeltif Reani <sup>1</sup>, Brahim Sabour <sup>1</sup> and Vitor Vasconcelos <sup>4,5,\*</sup>

<sup>1</sup> R.U. Phycology, Blue Biodiversity & Biotechnology – P3B, Laboratory of Plant Biotechnology, Ecology and Ecosystem Valorization, Faculty of Sciences, Chouaib Doukkali University, PO Box 20, M-24000 El Jadida; belattmania.z@ucdac.ma (Z.B.); souk.kaidi@gmail.com (S.K.); elatouanisamir@gmail.com (S.E.); chaimaakatif25@gmail.com (C.K.); abreani@yahoo.fr (A.R.); sabour.b@ucd.ac.ma (B.S.)

<sup>2</sup> Laboratory of Catalysis and Corrosion of Materials, Faculty of Sciences, Chouaib Doukkali University, PO Box 20, M-24000 El Jadida, Morocco; fbentiss@gmail.com (F.B.)

<sup>3</sup> University of Lille, CNRS, INRAE, Centrale Lille, UMR 8207, UMET – Unité Matériaux et Transformations, F-59000 Lille, France; charafeddine.jama@ensc-lille.fr (C.J.)

<sup>4</sup> CIIMAR, Interdisciplinary Centre of Marine and Environmental Research, University of Porto, Terminal de Cruzeiros do Porto de Leixões, Av. General Norton de Matos, s/n, 4450-208 Matosinhos, Portugal

<sup>5</sup> Department of Biology, Faculty of Sciences, University of Porto, Rua do Campo Alegre, 4169-007 Porto, Portugal

\* Correspondence: vmvascon@fc.up.pt; Tel.: 351-223401817 (V.V.)

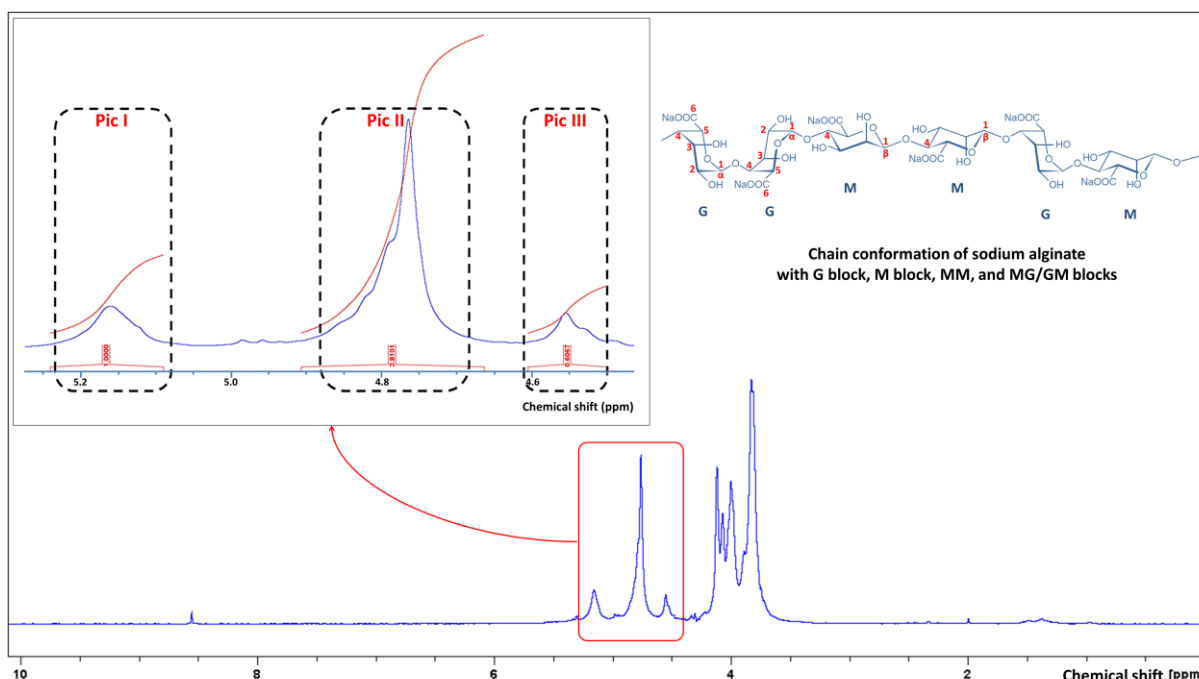

**Figure S1.** The anomeric region in the 400 MHz -  $^1\text{H}$  NMR spectrum of the Sigma-Aldrich sodium alginate using  $\text{D}_2\text{O}$  as solvent.

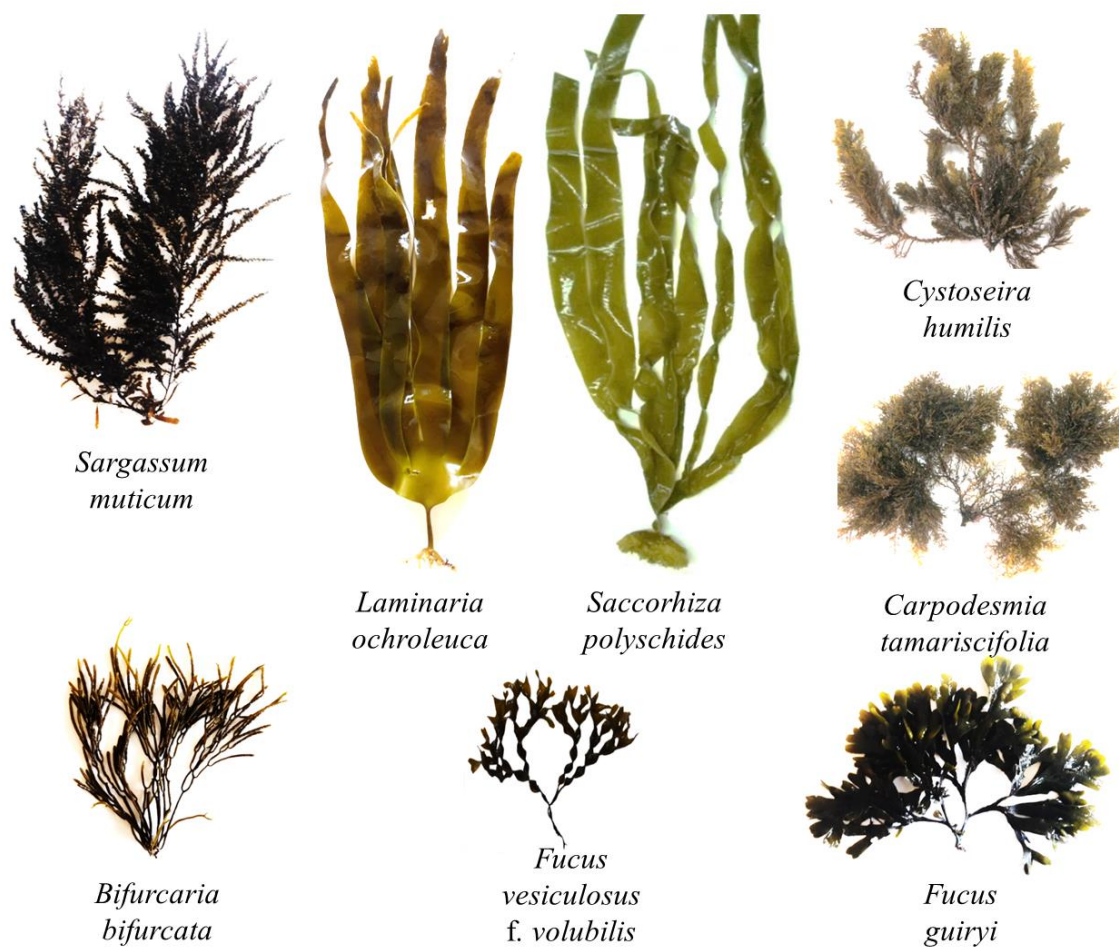

**Figure 2S.** Morphological traits of the studied macroalgae collected on the Northwestern Atlantic coast of Morocco.
